# Supplementary material
Source: PubMed Central journal article supplement (PMC8546033)
Supplement: mmc1.pdf [file mmc1.pdf]

**The American Journal of Human Genetics, Volume 108**

**Supplemental information**

**Genetic determinants of blood-cell traits  
influence susceptibility to  
childhood acute lymphoblastic leukemia**

**Linda Kachuri, Soyoung Jeon, Andrew T. DeWan, Catherine Metayer, Xiaomei Ma, John S. Witte, Charleston W.K. Chiang, Joseph L. Wiemels, and Adam J. de Smith**

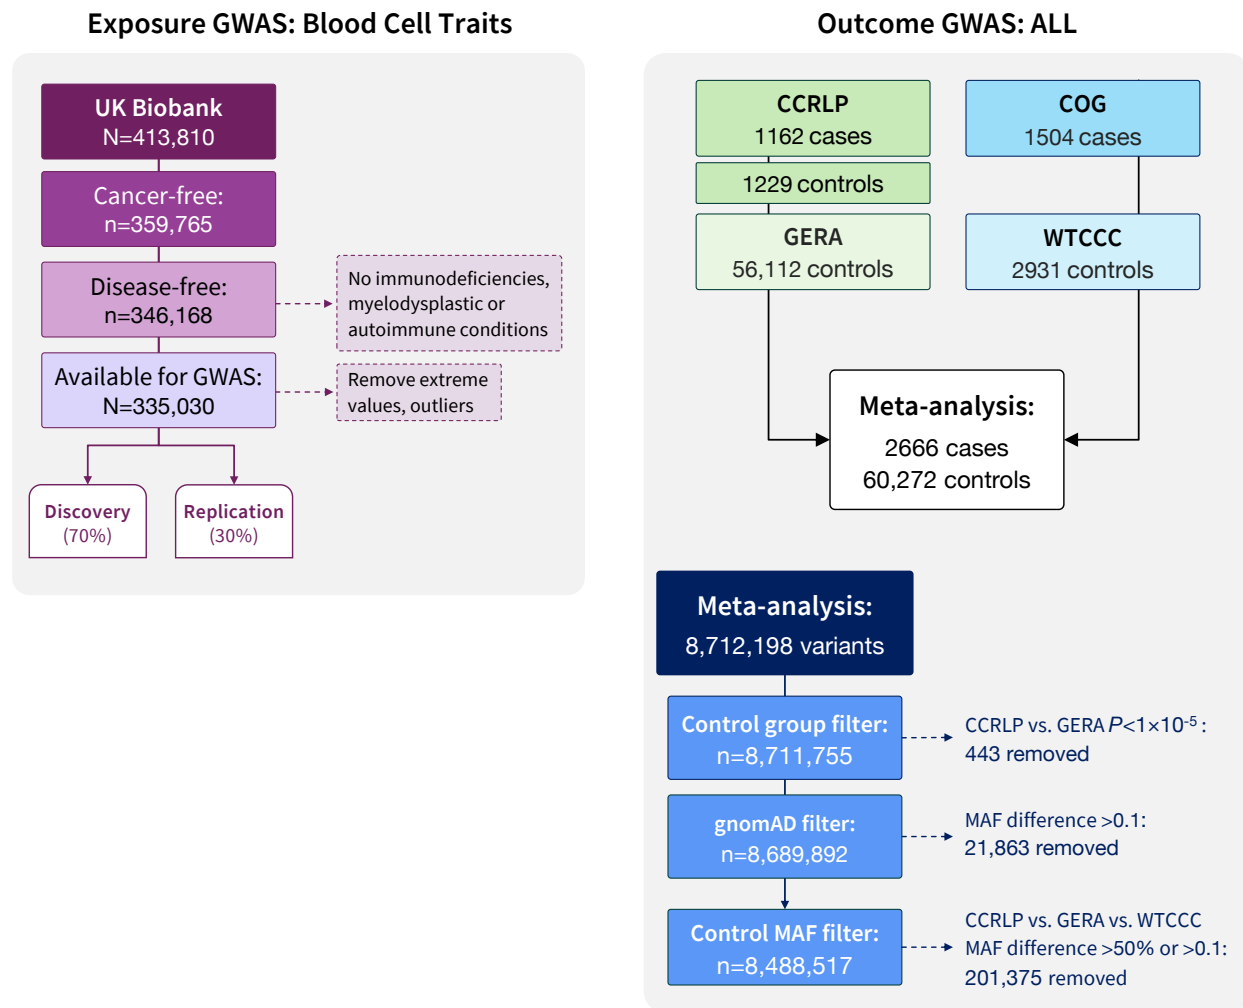

**Figure S1: Overview of study populations.** Flowchart outlining the inclusion criteria for study participants and I quality control steps. All subjects were restricted to individuals of predominantly European ancestry.

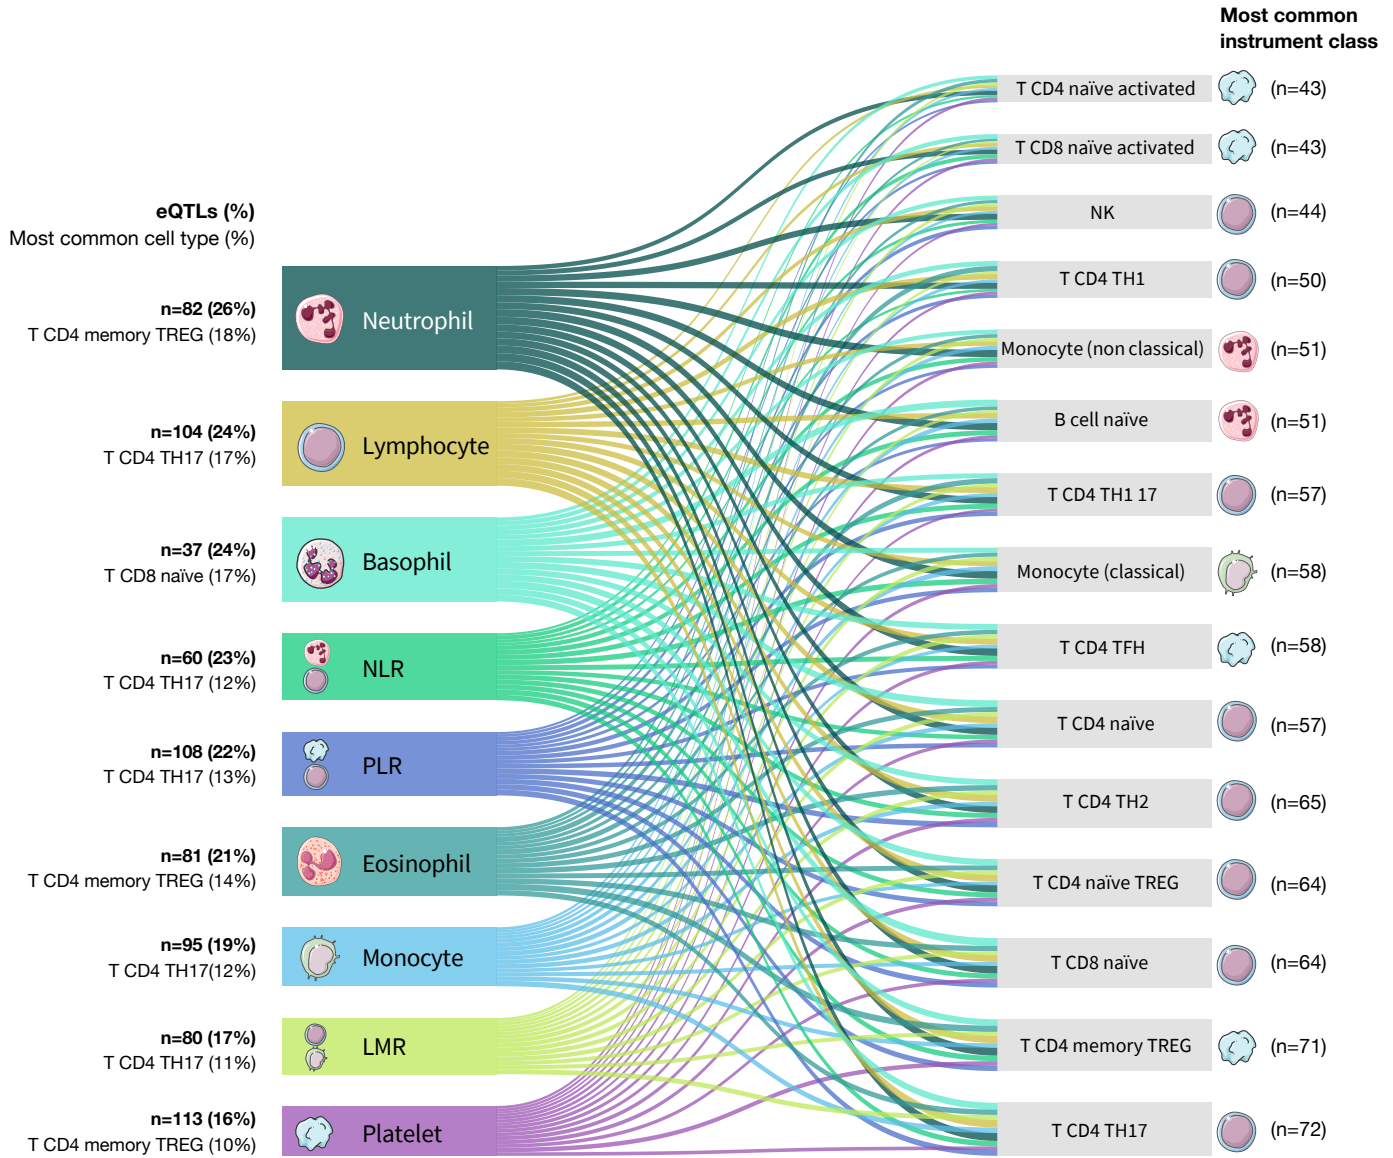

**Figure S2: Gene expression in immune cells.** Sankey style plot illustrating the pattern of cell-type specific effects on gene expression obtained from DICE (Database of Immune Cell Expression) for blood cell trait genetic instruments. Genetic instruments were considered expression quantitative trait loci (eQTL) if their associations with gene expression were significant at  $FDR < 0.05$ . The color of each band corresponds to the blood cell type and the width of each band is scaled to reflect the proportion of all eQTL signals accounted for by a specific cell type.

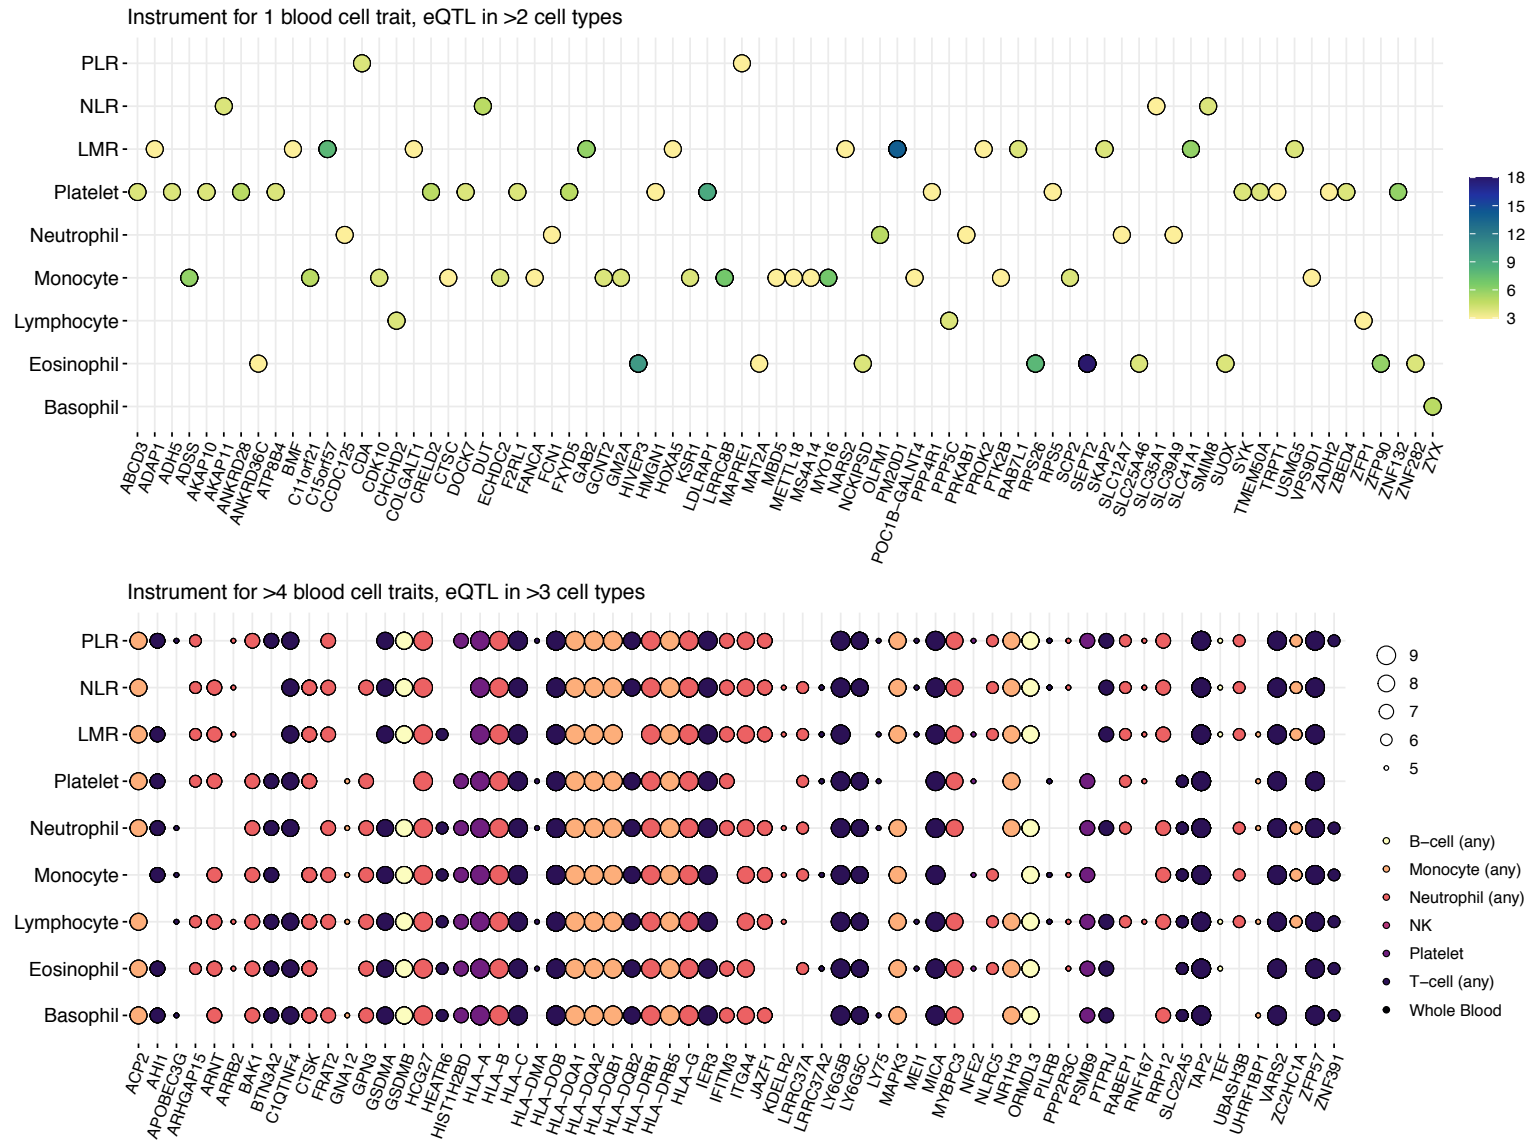

**Figure S3: Gene expression targets in multiple tissues and cell types.** Genetic instruments were considered expression quantitative trait loci (eQTL) if their associations with gene expression were significant at  $FDR < 0.05$ . For a given variant, all significant eQTL effects in more than one cell type were retained, but these were not required to be for the same gene. Associations are visualized for each unique eGene-cell group combination. The upper panel shows eGenes for genetic instruments specific to one blood count or ratio trait, with the color of each circle corresponding to the number of cell types in which eQTL effects were observed. The lower panel summarizes eQTL effects for variants that are instruments for multiple blood count or ratio phenotypes ( $>4$ ), indicated by the size of the circle. The color of the circle corresponds to the eQTL tissue(s) for each eGene.

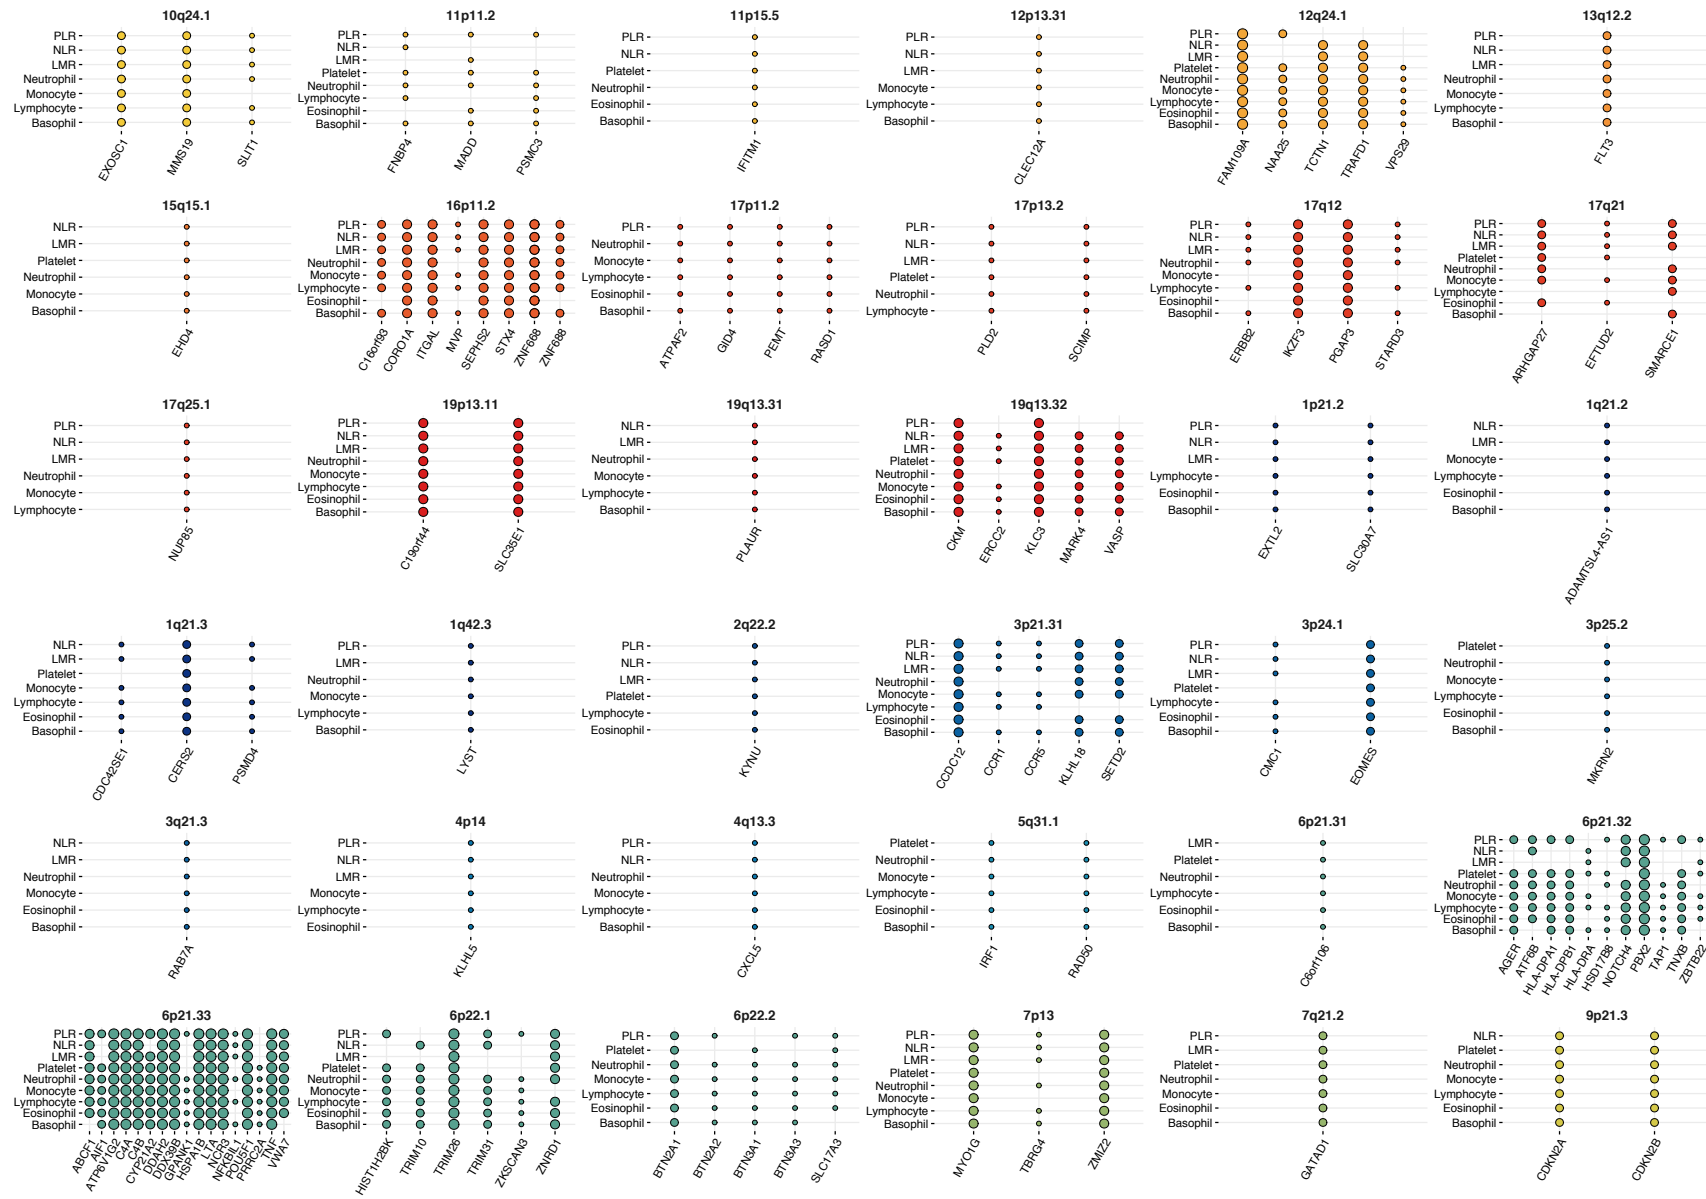

**Figure S4: Gene expression targets in whole blood.** Genetic instruments were considered expression quantitative trait loci (eQTL) if their associations with gene expression were significant at  $FDR < 0.05$ . Associations were filtered to retain eGenes (genes with significant eQTLs) among variants that were genetic instruments for  $> 5$  blood cell traits with eQTL effects in a single tissue (whole blood). The size of each circle is proportional to the number of phenotypes for each eGene, ranging from 6 to 9. Circles are colored by chromosome.

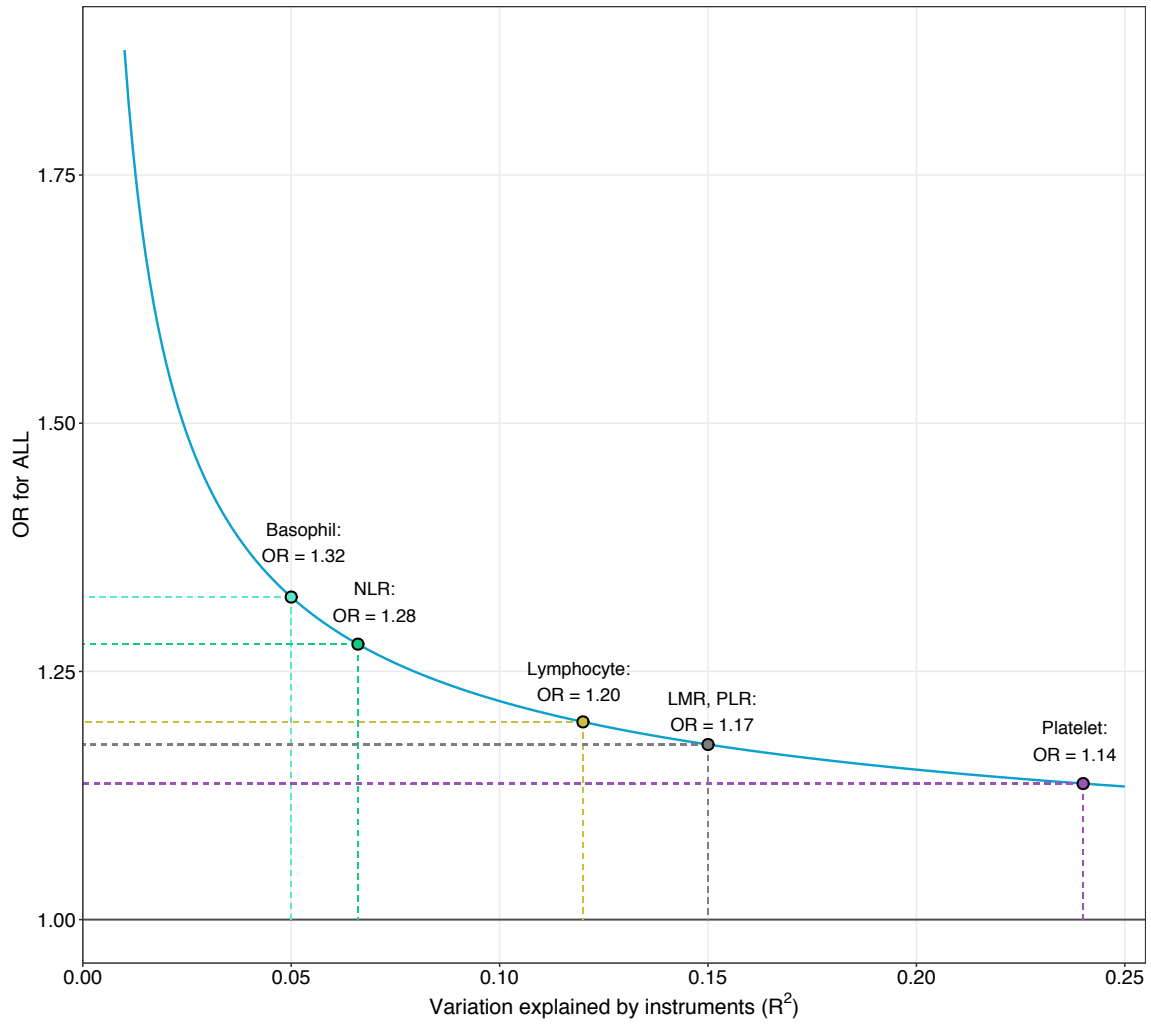

**Figure S5: Power calculations for Mendelian randomization analysis.** Minimum detectable odds ratio at 80% power for each blood cell trait based on the observed instrument strength and available sample size for the outcome.

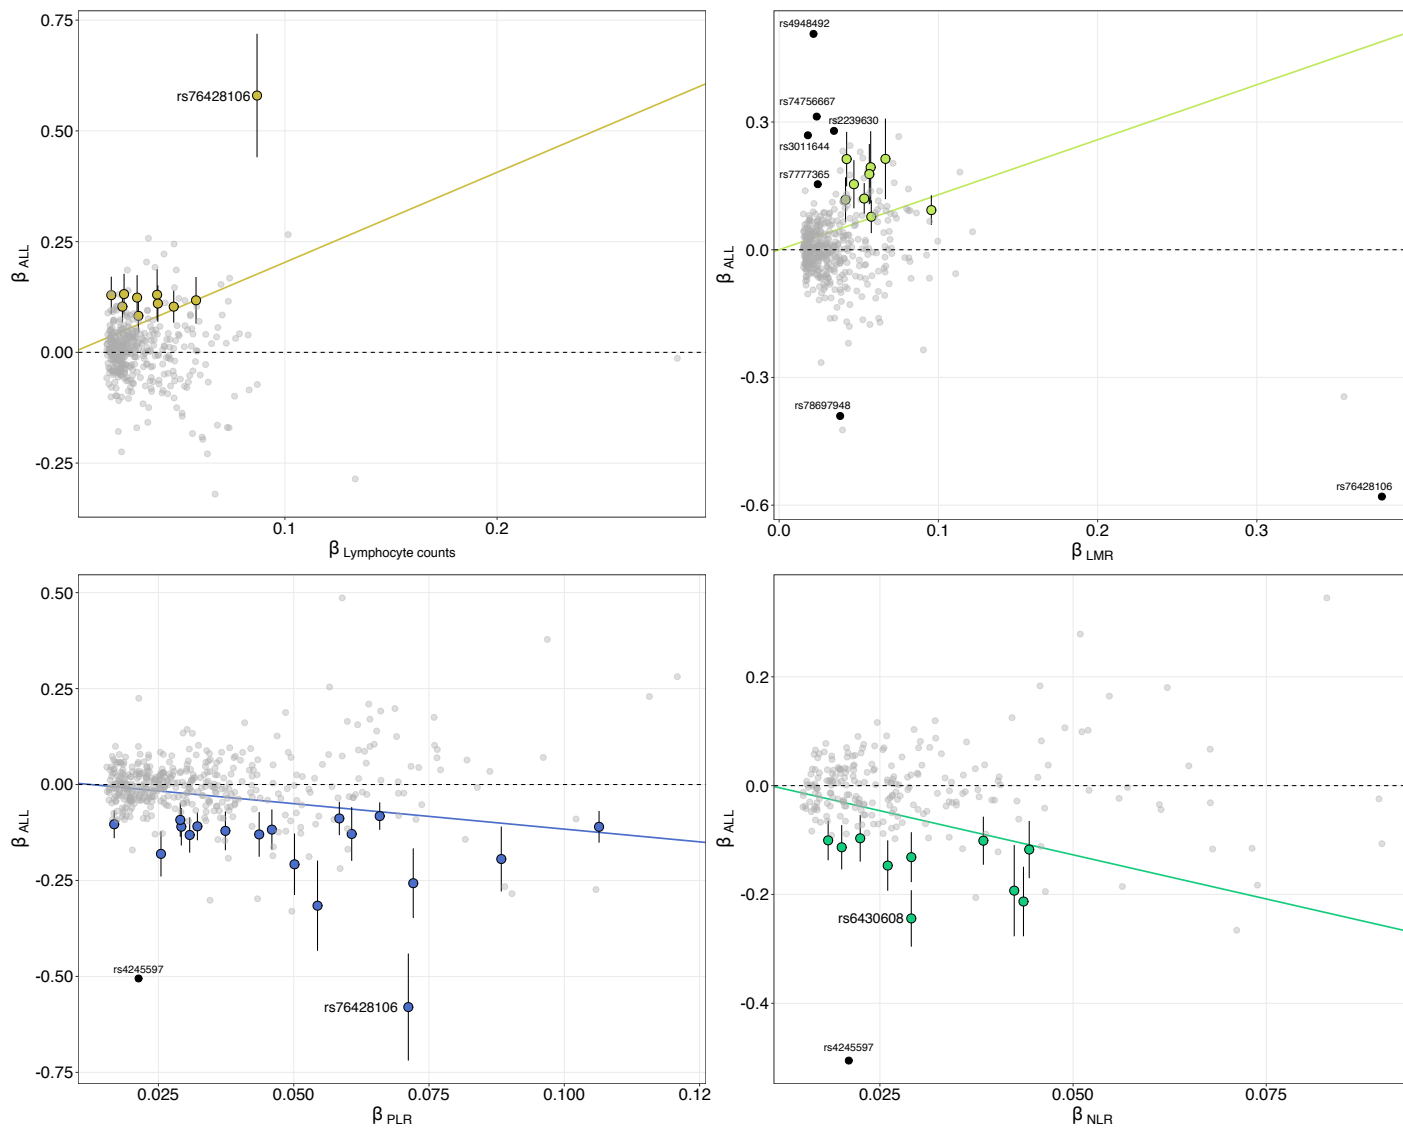

**Figure S6: Visualization of MR Clust results.** MR Clust was used to identify subgroups of variants with homogenous causal effects and novel ALL risk variants. The slope of the line corresponds to the mean causal effect within each cluster. Substantive clusters included variants with an assignment probability of greater than 50%. Outliers are denoted by solid black circles. Only variants significantly associated with ALL at the Bonferroni-corrected threshold ( $P_{ALL} < 5 \times 10^{-5}$ ) are labeled.

**Table S1: Heritability estimates for blood cell traits and acute lymphoblastic leukemia.** Array-based heritability ( $h_g$ ) estimates for acute lymphoblastic leukemia (ALL) and blood cell subtypes: lymphocytes, monocytes, neutrophils, basophils, eosinophils, basophils, platelets, lymphocyte to monocyte ratio (LMR), neutrophil to lymphocyte ratio (NLR), and platelet to lymphocyte ratio (PLR) estimated with LD score regression using UKB LD scores from European ancestry participants as the reference panel (7,166,343 variants).

| Phenotype            | $h_g$ | (SE)    |
|----------------------|-------|---------|
| White blood cells    | 0.141 | (0.009) |
| Lymphocytes          | 0.165 | (0.014) |
| Monocytes            | 0.156 | (0.017) |
| Neutrophils          | 0.122 | (0.011) |
| Eosinophils          | 0.128 | (0.012) |
| Basophils            | 0.031 | (0.004) |
| Platelets            | 0.218 | (0.017) |
| NLR                  | 0.095 | (0.006) |
| LMR                  | 0.117 | (0.011) |
| PLR                  | 0.161 | (0.014) |
| ALL <sup>1</sup>     |       |         |
| Lifetime risk: 0.15% | 0.181 | (0.013) |
| Lifetime risk: 0.10% | 0.169 | (0.012) |

<sup>1</sup> For ALL heritability was transformed to the liability scale using SEER estimates of lifetime for non-Hispanic whites (0.15%), with a sensitivity analysis using a lower lifetime risk estimate.



**Table S2: Genetic correlation between blood cell phenotypes.** Matrix of genetic correlation estimates ( $r_g$ ) for cell counts and ratios (lymphocyte to monocyte: LMR; neutrophil to lymphocyte: NLR; platelet to lymphocyte ratio: PLR) calculated using LD score regression. Correlations with  $p < 1.4 \times 10^{-3}$  were considered statistically significant after Bonferroni correction for 36 pairs tested.

|             | Lymphocytes                           | Monocytes                            | Neutrophils                         | Eosinophils                         | Basophils                            | Platelets                            | LMR                                  | NLR                                   | PLR                                   |
|-------------|---------------------------------------|--------------------------------------|-------------------------------------|-------------------------------------|--------------------------------------|--------------------------------------|--------------------------------------|---------------------------------------|---------------------------------------|
| Lymphocytes | 1.0                                   | 0.405<br>$p = 1.26 \times 10^{-8}$   | 0.384<br>$p = 1.40 \times 10^{-51}$ | 0.255<br>$p = 5.47 \times 10^{-21}$ | 0.378<br>$p = 1.02 \times 10^{-26}$  | 0.224<br>$p = 3.83 \times 10^{-35}$  | 0.468<br>$p = 2.77 \times 10^{-48}$  | -0.616<br>$p = 1.34 \times 10^{-145}$ | -0.702<br>$p = 2.77 \times 10^{-393}$ |
| Monocytes   | 0.405<br>$p = 1.26 \times 10^{-8}$    | 1.0                                  | 0.449<br>$p = 1.77 \times 10^{-83}$ | 0.265<br>$p = 1.84 \times 10^{-26}$ | 0.267<br>$p = 8.28 \times 10^{-17}$  | 0.213<br>$p = 6.81 \times 10^{-26}$  | -0.612<br>$p = 1.88 \times 10^{-74}$ | -0.004<br>$p = 0.89$                  | -0.196<br>$p = 2.45 \times 10^{-20}$  |
| Neutrophils | 0.384<br>$p = 1.40 \times 10^{-51}$   | 0.449<br>$p = 1.77 \times 10^{-83}$  | 1.0                                 | 0.219<br>$p = 1.52 \times 10^{-16}$ | 0.442<br>$p = 4.00 \times 10^{-33}$  | 0.236<br>$p = 1.65 \times 10^{-26}$  | -0.069<br>$p = 0.017$                | 0.480<br>$p = 5.89 \times 10^{-64}$   | -0.158<br>$p = 2.74 \times 10^{-8}$   |
| Eosinophils | 0.255<br>$p = 5.47 \times 10^{-21}$   | 0.265<br>$p = 1.84 \times 10^{-26}$  | 0.219<br>$p = 1.52 \times 10^{-16}$ | 1.0                                 | 0.268<br>$p = 2.43 \times 10^{-17}$  | 0.155<br>$p = 2.24 \times 10^{-9}$   | -0.022<br>$p = 0.32$                 | -0.061<br>$p = 0.017$                 | -0.112<br>$p = 6.29 \times 10^{-7}$   |
| Basophils   | 0.378<br>$p = 1.02 \times 10^{-26}$   | 0.267<br>$p = 8.28 \times 10^{-17}$  | 0.442<br>$p = 4.00 \times 10^{-33}$ | 0.268<br>$p = 2.43 \times 10^{-17}$ | 1.0                                  | 0.158<br>$p = 2.31 \times 10^{-8}$   | 0.104<br>$p = 1.9 \times 10^{-3}$    | 0.037<br>$p = 0.40$                   | -0.208<br>$p = 1.12 \times 10^{-10}$  |
| Platelets   | 0.224<br>$p = 3.83 \times 10^{-35}$   | 0.213<br>$p = 6.81 \times 10^{-26}$  | 0.236<br>$p = 1.65 \times 10^{-26}$ | 0.155<br>$p = 2.24 \times 10^{-9}$  | 0.158<br>$p = 2.31 \times 10^{-8}$   | 1.0                                  | -0.005<br>$p = 0.74$                 | -0.004<br>$p = 0.82$                  | 0.535<br>$p = 3.08 \times 10^{-123}$  |
| LMR         | 0.468<br>$p = 2.77 \times 10^{-48}$   | -0.612<br>$p = 1.88 \times 10^{-74}$ | -0.069<br>$p = 0.017$               | -0.022<br>$p = 0.32$                | 0.104<br>$p = 1.9 \times 10^{-3}$    | -0.005<br>$p = 0.74$                 | 1.0                                  | -0.496<br>$p = 1.37 \times 10^{-63}$  | -0.408<br>$p = 9.35 \times 10^{-39}$  |
| NLR         | -0.616<br>$p = 1.34 \times 10^{-145}$ | -0.004<br>$p = 0.89$                 | 0.480<br>$p = 5.89 \times 10^{-64}$ | -0.061<br>$p = 0.017$               | 0.037<br>$p = 0.40$                  | -0.004<br>$p = 0.82$                 | -0.496<br>$p = 1.37 \times 10^{-63}$ | 1.0                                   | 0.532<br>$p = 4.68 \times 10^{-80}$   |
| PLR         | -0.702<br>$p = 2.77 \times 10^{-393}$ | -0.196<br>$p = 2.45 \times 10^{-20}$ | -0.158<br>$p = 2.74 \times 10^{-8}$ | -0.112<br>$p = 6.29 \times 10^{-7}$ | -0.208<br>$p = 1.12 \times 10^{-10}$ | 0.535<br>$p = 3.08 \times 10^{-123}$ | -0.408<br>$p = 9.35 \times 10^{-39}$ | 0.532<br>$p = 4.68 \times 10^{-80}$   | 1.0                                   |

**Table S4: Overview of the properties of genetic instruments for blood cell traits.** Proportion of trait variation explained was estimated in the independent UK Biobank replication sample of over 100,000 individuals. Instruments applied includes available variants and proxies (LD  $r^2 > 0.95$ ) in the outcome GWAS meta-analysis of acute lymphoblastic leukemia.

| Trait       | Instruments Available |               | Instruments Applied |               |                               |
|-------------|-----------------------|---------------|---------------------|---------------|-------------------------------|
|             | N                     | Variation (%) | N                   | Variation (%) | Mean F-statistic <sup>1</sup> |
| Lymphocytes | 429                   | 11.9          | 406                 | 10.7          | 71.1                          |
| Monocytes   | 505                   | 16.9          | 477                 | 16.3          | 85.6                          |
| Neutrophils | 313                   | 9.4           | 301                 | 8.7           | 69.4                          |
| Eosinophils | 387                   | 11.1          | 363                 | 10.4          | 71.8                          |
| Basophils   | 157                   | 5.1           | 144                 | 4.5           | 64.6                          |
| Platelets   | 692                   | 24.4          | 661                 | 23.4          | 85.8                          |
| NLR         | 266                   | 6.6           | 246                 | 6.0           | 63.8                          |
| LMR         | 464                   | 15.0          | 432                 | 14.4          | 83.8                          |
| PLR         | 489                   | 15.1          | 462                 | 14.0          | 76.5                          |

<sup>1</sup> F-statistic of 10 from the instrument-exposure regression corresponds to the minimum instrument strength required for avoiding weak instrument bias

**Table S6: Expression quantitative trait loci (eQTL) identified among genetic instruments for blood cell traits.** Number of significant eQTLs and corresponding eGenes detected among 3000 genetic instruments, summarized by broad tissue/cell group and specific cell type.

| eQTL Cell Group         | eQTL <sup>1</sup> |        | eQTL ( $P < 5 \times 10^{-8}$ ) |        |        | eQTL Cell Type            | eQTL <sup>1</sup> |        | eQTL ( $P < 5 \times 10^{-8}$ ) |        |        | eQTL Study and Sample Size |       |
|-------------------------|-------------------|--------|---------------------------------|--------|--------|---------------------------|-------------------|--------|---------------------------------|--------|--------|----------------------------|-------|
|                         | N <sub>SNP</sub>  | (%)    | N <sub>SNP</sub>                | %      | eGenes |                           | N <sub>SNP</sub>  | (%)    | N <sub>SNP</sub>                | (%)    | eGenes |                            |       |
| Whole Blood             | 2405              | (80.2) | 2253                            | (75.1) | 2981   | Whole Blood               | 2405              | (80.2) | 2253                            | (75.1) | 2981   | Vosa bioRxiv: 447367       | 31684 |
| Monocytes (any)         | 810               | (27.0) | 514                             | (17.1) | 431    | Monocyte                  | 559               | (18.6) | 370                             | (12.3) | 328    | Chen PMID: 27863251        | 197   |
|                         |                   |        |                                 |        |        | Monocyte (CD14 classical) | 376               | (12.5) | 231                             | (7.7)  | 148    | Momozawa PMID: 29930244    | 322   |
|                         |                   |        |                                 |        |        | Monocyte (CD14 classical) | 228               | (7.6)  | 83                              | (2.8)  | 68     | Schmiedel PMID: 30449622   | 91    |
|                         |                   |        |                                 |        |        | Monocyte (non-classical)  | 206               | (6.9)  | 64                              | (2.1)  | 58     | Schmiedel PMID: 30449622   | 91    |
| Neutrophils (any)       | 633               | (21.1) | 419                             | (14)   | 341    | Neutrophil                | 458               | (15.3) | 289                             | (9.6)  | 274    | Chen PMID: 27863251        | 197   |
|                         |                   |        |                                 |        |        | Neutrophil (CD15)         | 391               | (13)   | 253                             | (8.4)  | 168    | Momozawa PMID: 29930244    | 322   |
| T-cells (any)           | 708               | (23.6) | 362                             | (12.1) | 327    | T-cell                    | 430               | (14.3) | 277                             | (9.2)  | 233    | Chen PMID: 27863251        | 197   |
|                         |                   |        |                                 |        |        | T CD8 (naïve)             | 221               | (7.4)  | 87                              | (2.9)  | 84     | Schmiedel PMID: 30449622   | 91    |
|                         |                   |        |                                 |        |        | T CD4 TH17                | 242               | (8.1)  | 78                              | (2.6)  | 75     | Schmiedel PMID: 30449622   | 91    |
|                         |                   |        |                                 |        |        | T_CD4 (memory TREG)       | 230               | (7.7)  | 79                              | (2.6)  | 73     | Schmiedel PMID: 30449622   | 91    |
|                         |                   |        |                                 |        |        | T_CD4 (naïve TREG)        | 228               | (7.6)  | 77                              | (2.6)  | 79     | Schmiedel PMID: 30449622   | 91    |
|                         |                   |        |                                 |        |        | T_CD4_TH2                 | 222               | (7.4)  | 74                              | (2.5)  | 69     | Schmiedel PMID: 30449622   | 91    |
|                         |                   |        |                                 |        |        | T_CD4 (naïve)             | 223               | (7.4)  | 69                              | (2.3)  | 71     | Schmiedel PMID: 30449622   | 91    |
|                         |                   |        |                                 |        |        | T_CD4_TFH                 | 216               | (7.2)  | 66                              | (2.2)  | 65     | Schmiedel PMID: 30449622   | 91    |
|                         |                   |        |                                 |        |        | T_CD4_TH1_17              | 207               | (6.9)  | 64                              | (2.1)  | 61     | Schmiedel PMID: 30449622   | 91    |
|                         |                   |        |                                 |        |        | T_CD4_TH1                 | 182               | (6.1)  | 51                              | (1.7)  | 45     | Schmiedel PMID: 30449622   | 91    |
|                         |                   |        |                                 |        |        | T_CD8 (naïve activated)   | 148               | (4.9)  | 48                              | (1.6)  | 39     | Schmiedel PMID: 30449622   | 91    |
| T_CD4 (naïve activated) | 138               | (4.6)  | 45                              | (1.5)  | 42     | Schmiedel PMID: 30449622  | 91                |        |                                 |        |        |                            |       |
| B-cells (any)           | 341               | (11.4) | 166                             | (5.5)  | 119    | B-cell (CD19)             | 233               | (7.8)  | 125                             | (4.2)  | 69     | Momozawa PMID: 29930244    | 322   |
|                         |                   |        |                                 |        |        | B-cell (naïve)            | 185               | (6.2)  | 73                              | (2.4)  | 62     | Schmiedel PMID: 30449622   | 91    |
| Platelets               | 119               | (4.0)  | 72                              | (2.4)  | 51     | Platelets                 | 119               | (4.0)  | 72                              | (2.4)  | 51     | Momozawa PMID: 29930244    | 322   |
| NK cells                | 154               | (5.1)  | 48                              | (1.6)  | 44     | NK cells                  | 154               | (5.1)  | 48                              | (1.6)  | 44     | Schmiedel PMID: 30449622   | 91    |

<sup>1</sup> Genetic instruments were considered expression quantitative trait loci (eQTL) if their associations with gene expression were significant at FDR < 0.05 within each dataset

**Table S7: Mendelian randomization results.** Odds ratios (OR) and 95% confidence intervals (CI) for the effect of increasing blood cell counts or cell type ratios on the risk of acute lymphoblastic leukemia (ALL).

| Trait       | MR Estimator                        | N <sub>SNP</sub> | Association Estimates |               |                      |
|-------------|-------------------------------------|------------------|-----------------------|---------------|----------------------|
|             |                                     |                  | OR                    | (95% CI)      | P                    |
| Basophils   | IVW (multiplicative random effects) | 144              | 0.95                  | (0.59 – 1.53) | 0.83                 |
|             | Maximum likelihood                  |                  | 0.95                  | (0.66 – 1.36) | 0.77                 |
|             | Weighted median                     |                  | 1.31                  | (0.71 – 2.39) | 0.39                 |
|             | PRESSO (corrected)                  |                  | 0.94                  | (0.62 – 1.43) | 0.78                 |
|             | RAPS shrinkage                      |                  | 0.97                  | (0.67 – 1.41) | 0.86                 |
| Eosinophils | IVW (multiplicative random effects) | 363              | 1.01                  | (0.84 – 1.22) | 0.91                 |
|             | Maximum likelihood                  |                  | 1.01                  | (0.86 – 1.18) | 0.89                 |
|             | Weighted median                     |                  | 0.84                  | (0.64 – 1.09) | 0.19                 |
|             | PRESSO (corrected)                  |                  | 1.00                  | (0.84 – 1.21) | 0.97                 |
|             | RAPS shrinkage                      |                  | 0.95                  | (0.81 – 1.12) | 0.55                 |
| Lymphocytes | IVW (multiplicative random effects) | 406              | 1.15                  | (0.99 – 1.34) | 0.061                |
|             | Maximum likelihood                  |                  | 1.16                  | (1.01 – 1.33) | 0.035                |
|             | Weighted median                     |                  | 0.96                  | (0.71 – 1.29) | 0.78                 |
|             | PRESSO (corrected)                  |                  | 1.14                  | (0.98 – 1.32) | 0.087                |
|             | RAPS shrinkage                      |                  | 1.16                  | (1.01 – 1.34) | 0.033                |
| Monocytes   | IVW (multiplicative random effects) | 477              | 1.01                  | (0.98 – 1.05) | 0.49                 |
|             | Maximum likelihood                  |                  | 1.01                  | (0.98 – 1.04) | 0.40                 |
|             | Weighted median                     |                  | 1.02                  | (0.99 – 1.05) | 0.25                 |
|             | PRESSO (corrected)                  |                  | 1.01                  | (0.98 – 1.04) | 0.52                 |
|             | RAPS shrinkage                      |                  | 1.01                  | (0.98 – 1.04) | 0.39                 |
| Neutrophils | IVW (multiplicative random effects) | 301              | 1.04                  | (0.85 – 1.27) | 0.70                 |
|             | Maximum likelihood                  |                  | 1.04                  | (0.87 – 1.25) | 0.67                 |
|             | Weighted median                     |                  | 1.08                  | (0.80 – 1.46) | 0.62                 |
|             | PRESSO (corrected)                  |                  | 1.00                  | (0.83 – 1.22) | 0.97                 |
|             | RAPS shrinkage                      |                  | 1.01                  | (0.84 – 1.22) | 0.93                 |
| Platelets   | IVW (multiplicative random effects) | 661              | 1.02                  | (0.97 – 1.06) | 0.51                 |
|             | Maximum likelihood                  |                  | 1.02                  | (0.97 – 1.06) | 0.47                 |
|             | Weighted median                     |                  | 1.02                  | (0.97 – 1.08) | 0.36                 |
|             | PRESSO (corrected)                  |                  | 1.02                  | (0.97 – 1.07) | 0.40                 |
|             | RAPS shrinkage                      |                  | 1.02                  | (0.97 – 1.06) | 0.49                 |
| LMR         | IVW (multiplicative random effects) | 432              | 1.22                  | (1.00 – 1.50) | 0.052                |
|             | Maximum likelihood                  |                  | 1.23                  | (1.07 – 1.41) | 4.5×10 <sup>-3</sup> |
|             | Weighted median                     |                  | 1.02                  | (0.80 – 1.31) | 0.86                 |
|             | PRESSO (corrected)                  |                  | 1.18                  | (1.01 – 1.38) | 0.037                |
|             | RAPS shrinkage                      |                  | 1.14                  | (0.99 – 1.32) | 0.070                |

|     |                                     |     |      |               |                      |
|-----|-------------------------------------|-----|------|---------------|----------------------|
| NLR | IVW (multiplicative random effects) |     | 0.67 | (0.49 – 0.92) | 0.012                |
|     | Maximum likelihood                  |     | 0.67 | (0.54 – 0.83) | $3.1 \times 10^{-4}$ |
|     | Weighted median                     | 246 | 0.66 | (0.47 – 0.93) | 0.017                |
|     | PRESSO (corrected)                  |     | 0.77 | (0.60 – 0.98) | 0.036                |
|     | RAPS shrinkage                      |     | 0.73 | (0.58 – 0.91) | $5.6 \times 10^{-3}$ |
| PLR | IVW (multiplicative random effects) |     | 0.80 | (0.67 – 0.96) | 0.018                |
|     | Maximum likelihood                  |     | 0.80 | (0.70 – 0.92) | $2.0 \times 10^{-3}$ |
|     | Weighted median                     | 462 | 0.85 | (0.67 – 1.08) | 0.18                 |
|     | PRESSO (corrected)                  |     | 0.82 | (0.70 – 0.96) | 0.014                |
|     | RAPS shrinkage                      |     | 0.85 | (0.73 – 0.98) | 0.025                |

**Table S8: Results of diagnostic tests carried out for Mendelian Randomization analyses.**

| Trait       | Heterogeneity <sup>1</sup> |     |                       | MR Egger <sup>2</sup> |             | MR PRESSO                 |                         | $I^2_{GX}$ <sup>5</sup> | $P_{Steiger}$ <sup>6</sup> |
|-------------|----------------------------|-----|-----------------------|-----------------------|-------------|---------------------------|-------------------------|-------------------------|----------------------------|
|             | Q                          | DF  | $P_{Q-value}$         | $\beta_0$             | $P_{Egger}$ | $P_{Global}$ <sup>3</sup> | $P_{Dist}$ <sup>4</sup> |                         |                            |
| Basophils   | 262.3                      | 143 | $4.7 \times 10^{-9}$  | -0.0099               | 0.40        | $<6.7 \times 10^{-5}$     | 0.98                    | 0.985                   | $1.8 \times 10^{-14}$      |
| Eosinophils | 509.9                      | 360 | $3.1 \times 10^{-7}$  | 0.0028                | 0.69        | $<6.7 \times 10^{-5}$     | 0.04                    | 0.986                   | $1.6 \times 10^{-75}$      |
| Lymphocytes | 512.1                      | 398 | $9.4 \times 10^{-5}$  | 0.0082                | 0.09        | $<6.7 \times 10^{-5}$     | 0.88                    | 0.986                   | $5.0 \times 10^{-135}$     |
| Monocytes   | 708.8                      | 472 | $9.0 \times 10^{-12}$ | -0.0040               | 0.15        | $2.7 \times 10^{-4}$      | 0.69                    | 0.988                   | $1.8 \times 10^{-269}$     |
| Neutrophils | 368.3                      | 299 | $3.8 \times 10^{-3}$  | -0.0098               | 0.16        | $3.7 \times 10^{-3}$      | 0.03                    | 0.986                   | $3.8 \times 10^{-120}$     |
| Platelets   | 764.5                      | 654 | $1.8 \times 10^{-3}$  | -0.0002               | 0.93        | $3.1 \times 10^{-3}$      | 0.75                    | 0.988                   | $<1 \times 10^{-300}$      |
| LMR         | 899.0                      | 428 | $1.2 \times 10^{-35}$ | 0.0097                | 0.15        | $<6.7 \times 10^{-5}$     | 0.63                    | 0.988                   | $5.4 \times 10^{-98}$      |
| NLR         | 524.1                      | 242 | $6.8 \times 10^{-23}$ | -0.0103               | 0.39        | $<6.7 \times 10^{-5}$     | 0.15                    | 0.984                   | $2.1 \times 10^{-10}$      |
| PLR         | 798.9                      | 456 | $4.1 \times 10^{-21}$ | -0.0071               | 0.30        | $<6.7 \times 10^{-5}$     | 0.83                    | 0.987                   | $1.2 \times 10^{-109}$     |

<sup>1</sup> Cochran's Q based on modified second order weights, p-values<0.05 indicate statistically significant heterogeneity

<sup>2</sup> Presence of statistically significant directional pleiotropy is indicated by non-zero intercept values with p<0.05

<sup>3</sup> Estimated based on 15000 replicates; p-values<0.05 indicate statistically significant pleiotropy

<sup>4</sup> Estimated based on 15000 replicates; p-values<0.05 indicate statistically significant distortion in causal effect estimates

<sup>5</sup>  $I^2_{GX}$  <0.90 indicates weak instrument bias due to violations of the no exposure measurement error assumption

<sup>6</sup> P-value for MR Steiger directionality test used to orient the causal effect and confirm that exposure → outcome

**Table S9: Sensitivity analyses following manual removal of invalid genetic instruments.** Odds ratios (OR) and 95% for acute lymphoblastic leukemia (ALL) were estimated using for selected traits after filtering out instruments that significantly contributed to heterogeneity.

| Trait       | MR Method                           | N /<br>N <sub>SNP</sub> | Association Estimates |               |                      | Diagnostics                 |                           |
|-------------|-------------------------------------|-------------------------|-----------------------|---------------|----------------------|-----------------------------|---------------------------|
|             |                                     |                         | OR                    | (95% CI)      | P                    | <i>P</i> <sub>Q-value</sub> | <i>P</i> <sub>Egger</sub> |
| Lymphocytes | IVW (multiplicative random effects) | 356 /                   | 1.18                  | (1.05 – 1.33) | 7.4×10 <sup>-3</sup> | 1.00                        | 0.17                      |
|             | Maximum likelihood                  | 406                     | 1.19                  | (1.02 – 1.37) | 0.023                |                             |                           |
| LMR         | IVW (multiplicative random effects) | 403 /                   | 1.19                  | (1.03 – 1.37) | 0.016                | 0.93                        | 0.22                      |
|             | Maximum likelihood                  | 432                     | 1.19                  | (1.02 – 1.38) | 0.022                |                             |                           |
| NLR         | IVW (multiplicative random effects) | 218 /                   | 0.67                  | (0.55 – 0.82) | 1.4×10 <sup>-4</sup> | 0.98                        | 0.81                      |
|             | Maximum likelihood                  | 246                     | 0.67                  | (0.53 – 0.84) | 6.5×10 <sup>-4</sup> |                             |                           |
| PLR         | IVW (multiplicative random effects) | 429 /                   | 0.82                  | (0.71 – 0.94) | 5.8×10 <sup>-3</sup> | 0.72                        | 0.72                      |
|             | Maximum likelihood                  | 462                     | 0.82                  | (0.71 – 0.95) | 7.3×10 <sup>-3</sup> |                             |                           |

**Table S10: Multivariable Mendelian randomization results.** Odds ratios (OR) and 95% for acute lymphoblastic leukemia (ALL), estimated using multivariable Mendelian Randomization (MVMR) for traits that were individually associated with ALL or were used to derive associated ratio phenotypes.

| Model            | Trait                     | MVMR Method <sup>1</sup>  | Association Estimates |               |                       |
|------------------|---------------------------|---------------------------|-----------------------|---------------|-----------------------|
|                  |                           |                           | OR                    | (95% CI)      | P                     |
| Cell types       | Lymphocytes               | IVW                       | 1.18                  | (1.06 – 1.31) | 3.31×10 <sup>-3</sup> |
|                  |                           | IVW (instrument specific) | 1.43                  | (1.16 – 1.76) | 8.83×10 <sup>-4</sup> |
|                  |                           | LASSO                     | 1.05                  |               |                       |
|                  | Monocytes                 | IVW                       | 1.02                  | (0.92 – 1.13) | 0.70                  |
|                  |                           | IVW (instrument specific) | 0.94                  | (0.83 – 1.08) | 0.40                  |
|                  |                           | LASSO                     | -                     |               |                       |
|                  | Neutrophils               | IVW                       | 0.93                  | (0.77 – 1.11) | 0.41                  |
|                  |                           | IVW (instrument specific) | 0.88                  | (0.68 – 1.14) | 0.33                  |
|                  |                           | LASSO                     | -                     |               |                       |
| Platelets        | IVW                       | 0.92                      | (0.85 – 0.99)         | 0.040         |                       |
|                  | IVW (instrument specific) | 0.95                      | (0.86 – 1.05)         | 0.30          |                       |
|                  | LASSO                     | -                         |                       |               |                       |
| LMR              | IVW                       | 1.00                      | (0.91 – 1.09)         | 0.97          |                       |
|                  | IVW (instrument specific) | 1.10                      | (0.92 – 1.31)         | 0.28          |                       |
|                  | LASSO                     | -                         |                       |               |                       |
| Cell type ratios | NLR                       | IVW                       | 0.95                  | (0.81 – 1.12) | 0.54                  |
|                  |                           | IVW (instrument specific) | 0.83                  | (0.60 – 1.14) | 0.25                  |
|                  |                           | LASSO                     | -                     |               |                       |
| PLR              | IVW                       | 0.90                      | (0.82 – 0.99)         | 0.034         |                       |
|                  | IVW (instrument specific) | 0.91                      | (0.77 – 1.09)         | 0.30          |                       |
|                  | LASSO                     | 0.82                      |                       |               |                       |

<sup>1</sup> For instrument-specific IVW variants were selected for each exposure based on  $P < 5 \times 10^{-8}$  and then all exposures for those SNPs are regressed together.



**Table S11: Mediation analysis of Mendelian randomization effects.** The total effect of blood cell ratios on ALL risk was decomposed into effects mediated by their component cell types. Total effects are based on Mendelian randomization results after filtering out instruments that significantly contributed to heterogeneity, as seen in Table S9.

| Trait | Effects                          | log(OR) | (95% CI) <sup>1</sup> | Mediated (%) |           |
|-------|----------------------------------|---------|-----------------------|--------------|-----------|
| LMR   | Total                            | 0.173   | (0.024, 0.322)        |              |           |
|       | Indirect (mediated): Lymphocytes | -0.025  | (-0.098, 0.053)       | 14.4         | (0, 16.5) |
|       | Indirect (mediated): Monocytes   | 0.066   | (-0.128, 0.264)       | 38.1         | (0, 82.1) |
| NLR   | Total                            | -0.399  | (-0.627, -0.171)      |              |           |
|       | Indirect (mediated): Lymphocytes | -0.044  | (-0.333, 0.245)       | 10.9         | (0, 53.1) |
|       | Indirect (mediated): Neutrophils | 0.008   | (-0.046, 0.063)       | 2.1          | (0, 7.3)  |
| PLR   | Total                            | -0.242  | (-0.449, -0.034)      |              |           |
|       | Indirect (mediated): Lymphocytes | -0.053  | (-0.255, 0.138)       | 21.9         | (0, 56.7) |
|       | Indirect (mediated): Platelets   | 0.043   | (-0.100, 0.202)       | 17.8         | (0, 22.3) |

<sup>1</sup> Bootstrapped 95% confidence intervals for direct and indirect (mediated) effects were obtained using 1000 replicates.

**Table S12: Annotation of blood cell trait instruments assigned to substantive clusters using the MR Clust algorithm.** For each blood cell trait, the substantive cluster mean corresponds to the causal effect on ALL, log odds ratio (OR) per 1 unit increase, indicated by the variants comprising that cluster. Clusters were limited to variants with assignment probability of greater than 50%. Published associations with other phenotypes were obtained by querying the PhenoScanner database.

| SNP        | $P_{ALL}$ | Lymphocyte | log(OR <sub>ALL</sub> ) |        |        | PMID     | Study        | Traits with $P < 5.0 \times 10^{-8}$                                                                                                                                                                                                                                                                                                                                                                                                                                                                                       |
|------------|-----------|------------|-------------------------|--------|--------|----------|--------------|----------------------------------------------------------------------------------------------------------------------------------------------------------------------------------------------------------------------------------------------------------------------------------------------------------------------------------------------------------------------------------------------------------------------------------------------------------------------------------------------------------------------------|
|            |           |            | LMR                     | NLR    | PLR    |          |              |                                                                                                                                                                                                                                                                                                                                                                                                                                                                                                                            |
| rs76428106 | 3.2E-05   | 2.032      | -                       | -      | -1.327 | 27863252 | Astle W      | Granulocyte count   Granulocyte percentage of myeloid white cells   Monocyte count   Monocyte percentage of white cells   Myeloid white cell count   Sum neutrophil eosinophil counts   White blood cell count                                                                                                                                                                                                                                                                                                             |
| rs1555137  | 2.0E-03   | 2.032      | -                       | -      | -      | 27863252 | Astle W      | Granulocyte count   Myeloid white cell count   Sum basophil neutrophil counts   White blood cell count                                                                                                                                                                                                                                                                                                                                                                                                                     |
| rs274555   | 3.7E-03   | 2.032      | -                       | -      | -      | 27863252 | Astle W      | Eosinophil count   Eosinophil percentage of granulocytes   Eosinophil percentage of white cells   Granulocyte count   High light scatter percentage of red cells   High light scatter reticulocyte count   Immature fraction of reticulocytes   Mean platelet volume   Monocyte count   Myeloid white cell count   Neutrophil count   Neutrophil percentage of granulocytes   Platelet count   Sum basophil neutrophil counts   Sum eosinophil basophil counts   Sum neutrophil eosinophil counts   White blood cell count |
|            |           |            |                         |        |        | 26192919 | IBDGC        | Crohns disease                                                                                                                                                                                                                                                                                                                                                                                                                                                                                                             |
| rs1633043  | 4.2E-03   | 2.032      | -                       | -3.240 | -1.327 | 27863252 | Astle W      | Hemoglobin concentration   High light scatter percentage of red cells   High light scatter reticulocyte count   Immature fraction of reticulocytes   Lymphocyte count   Lymphocyte percentage of white cells   Mean corpuscular hemoglobin   Mean corpuscular hemoglobin concentration   Mean corpuscular volume   Neutrophil percentage of white cells   Red cell distribution width   Reticulocyte count   Reticulocyte fraction of red cells                                                                            |
| rs3132571  | 4.3E-03   | 2.032      | -                       | -      | -      | 27863252 | Astle W      | Granulocyte count   Lymphocyte count   Mean platelet volume   Monocyte count   Myeloid white cell count   Neutrophil count   Platelet count   Reticulocyte count   Reticulocyte fraction of red cells   Sum basophil neutrophil counts   Sum eosinophil basophil counts   Sum neutrophil eosinophil counts   White blood cell count                                                                                                                                                                                        |
|            |           |            |                         |        |        | 27723758 | Bronson P    | IgA deficiency                                                                                                                                                                                                                                                                                                                                                                                                                                                                                                             |
|            |           |            |                         |        |        | 21323541 | Stanescu HC  | Idiopathic membranous nephropathy                                                                                                                                                                                                                                                                                                                                                                                                                                                                                          |
|            |           |            |                         |        |        | 17632545 | Hakonarson H | Type 1 diabetes                                                                                                                                                                                                                                                                                                                                                                                                                                                                                                            |
|            |           |            |                         |        |        | 27992413 | Ji S         | Primary sclerosing cholangitis                                                                                                                                                                                                                                                                                                                                                                                                                                                                                             |

|            |         |       |       |        |        |          |            |                                                                                                                                                                                                                                                                                                                                                                                                                                                                                                                                                                         |
|------------|---------|-------|-------|--------|--------|----------|------------|-------------------------------------------------------------------------------------------------------------------------------------------------------------------------------------------------------------------------------------------------------------------------------------------------------------------------------------------------------------------------------------------------------------------------------------------------------------------------------------------------------------------------------------------------------------------------|
| rs7776054  | 7.7E-03 | 2.032 | -     | -      | -1.327 | 27863252 | Astle W    | Eosinophil count   Granulocyte count   Hematocrit   Hemoglobin concentration   High light scatter percentage of red cells   Lymphocyte count   Mean corpuscular hemoglobin   Mean corpuscular hemoglobin concentration   Mean corpuscular volume   Monocyte count   Myeloid white cell count   Neutrophil count   Platelet count   Plateletcrit   Red blood cell count   Red cell distribution width   Reticulocyte fraction of red cells   Sum basophil neutrophil counts   Sum eosinophil basophil counts   Sum neutrophil eosinophil counts   White blood cell count |
|            |         |       |       |        |        | 19862010 | Ganesh SK  | Erythrocyte count   Hematocrit Hct   Mean corpuscular hemoglobin MCH   Mean corpuscular hemoglobin concentration   Mean corpuscular volume   Mean corpuscular hemoglobin   Erythrocyte indices                                                                                                                                                                                                                                                                                                                                                                          |
| rs11757367 | 0.015   | 2.032 | -     | -      | -      | 27863252 | Astle W    | Eosinophil count   Granulocyte count   Mean corpuscular hemoglobin   Mean corpuscular volume   Mean platelet volume   Monocyte count   Myeloid white cell count   Neutrophil count   Platelet count   Plateletcrit   Red blood cell count   Sum basophil neutrophil counts   Sum eosinophil basophil counts   Sum neutrophil eosinophil counts   White blood cell count                                                                                                                                                                                                 |
|            |         |       |       |        |        | 27723758 | Bronson P  | IgA deficiency                                                                                                                                                                                                                                                                                                                                                                                                                                                                                                                                                          |
|            |         |       |       |        |        | 20453842 | Stahl E    | Rheumatoid arthritis                                                                                                                                                                                                                                                                                                                                                                                                                                                                                                                                                    |
|            |         |       |       |        |        | 27992413 | Ji S       | Primary sclerosing cholangitis                                                                                                                                                                                                                                                                                                                                                                                                                                                                                                                                          |
|            |         |       |       |        |        | 24390342 | Okada Y    | Rheumatoid arthritis                                                                                                                                                                                                                                                                                                                                                                                                                                                                                                                                                    |
| rs2872516  | 0.024   | 2.032 | -     | -      | -      | 27863252 | Astle W    | Basophil count   Eosinophil percentage of granulocytes   Eosinophil percentage of white cells   Granulocyte count   Granulocyte percentage of myeloid white cells   Lymphocyte count   Lymphocyte percentage of white cells   Monocyte percentage of white cells   Myeloid white cell count   Neutrophil count   Neutrophil percentage of granulocytes   Neutrophil percentage of white cells   Sum basophil neutrophil counts   Sum neutrophil eosinophil counts   White blood cell count                                                                              |
|            |         |       |       |        |        | 29083406 | Ferreira M | Allergic disease                                                                                                                                                                                                                                                                                                                                                                                                                                                                                                                                                        |
|            |         |       |       |        |        | 26192919 | IBDGC      | Inflammatory bowel disease                                                                                                                                                                                                                                                                                                                                                                                                                                                                                                                                              |
| rs12722496 | 0.025   | 2.032 | -     | -      | -1.327 | 27863252 | Astle W    | Lymphocyte count   Lymphocyte percentage of white cells                                                                                                                                                                                                                                                                                                                                                                                                                                                                                                                 |
|            |         |       |       |        |        | 29083406 | Ferreira M | Allergic disease                                                                                                                                                                                                                                                                                                                                                                                                                                                                                                                                                        |
| rs28447467 | 0.026   | 2.032 | 1.292 | -3.240 | -1.327 | 27863252 | Astle W    | Lymphocyte count   Lymphocyte percentage of white cells   Neutrophil percentage of white cells   White blood cell count                                                                                                                                                                                                                                                                                                                                                                                                                                                 |
| rs61839660 | 8.6E-04 | -     | 1.292 | -3.240 | -      | 27863252 | Astle W    | Lymphocyte count   Lymphocyte percentage of white cells                                                                                                                                                                                                                                                                                                                                                                                                                                                                                                                 |
|            |         |       |       |        |        | 29083406 | Ferreira M | Allergic disease   Allergic disease asthma hay fever or eczema                                                                                                                                                                                                                                                                                                                                                                                                                                                                                                          |
|            |         |       |       |        |        | 22293688 | Huang J    | Type 1 diabetes   Diabetes mellitus type 1                                                                                                                                                                                                                                                                                                                                                                                                                                                                                                                              |
| rs4385425  | 9.7E-04 | -     | 1.292 | -      | -      | 27863252 | Astle W    | Granulocyte percentage of myeloid white cells   Monocyte count   Monocyte percentage of white cells   Neutrophil percentage of white cells                                                                                                                                                                                                                                                                                                                                                                                                                              |

|             |         |   |       |        |        |          |         |                                                                                                                                                                                                                                                                                                                                                                                                                                                 |
|-------------|---------|---|-------|--------|--------|----------|---------|-------------------------------------------------------------------------------------------------------------------------------------------------------------------------------------------------------------------------------------------------------------------------------------------------------------------------------------------------------------------------------------------------------------------------------------------------|
| rs62447197  | 6.5E-03 | - | 1.292 | -      | -      | 27863252 | Astle W | Granulocyte percentage of myeloid white cells   Monocyte count   Monocyte percentage of white cells                                                                                                                                                                                                                                                                                                                                             |
| rs10980797  | 7.6E-03 | - | 1.292 | -      | -      | 27863252 | Astle W | Granulocyte percentage of myeloid white cells   Monocyte count   Monocyte percentage of white cells   Myeloid white cell count   Neutrophil percentage of white cells   White blood cell count                                                                                                                                                                                                                                                  |
| rs57822871  | 0.012   | - | 1.292 | -      | -      | 27863252 | Astle W | Granulocyte percentage of myeloid white cells   Monocyte count   Monocyte percentage of white cells                                                                                                                                                                                                                                                                                                                                             |
| rs62447173  | 0.022   | - | 1.292 | -      | -      | 27863252 | Astle W | Granulocyte percentage of myeloid white cells   Monocyte count   Monocyte percentage of white cells                                                                                                                                                                                                                                                                                                                                             |
| rs67483792  | 0.0242  | - | 1.292 | -      | -      | 27863252 | Astle W | Granulocyte percentage of myeloid white cells   Monocyte count   Monocyte percentage of white cells                                                                                                                                                                                                                                                                                                                                             |
| rs369173    | 0.04424 | - | 1.292 | -      | -      | 27863252 | Astle W | Granulocyte count   Granulocyte percentage of myeloid white cells   Monocyte count   Monocyte percentage of white cells   Neutrophil count   Neutrophil percentage of white cells   Sum basophil neutrophil counts   Sum neutrophil eosinophil counts                                                                                                                                                                                           |
| rs6430608   | 2.5E-06 | - | -     | -3.240 | -      | -        | -       | -                                                                                                                                                                                                                                                                                                                                                                                                                                               |
| rs57153090  | 1.5E-03 | - | -     | -3.240 | -      | 27863252 | Astle W | Lymphocyte count   Lymphocyte percentage of white cells                                                                                                                                                                                                                                                                                                                                                                                         |
| rs2415288   | 5.3E-03 | - | -     | -3.240 | -      | 27863252 | Astle W | Lymphocyte count                                                                                                                                                                                                                                                                                                                                                                                                                                |
| rs35045014  | 6.0E-03 | - | -     | -3.240 | -      | 27863252 | Astle W | Eosinophil count   Eosinophil percentage of granulocytes   Eosinophil percentage of white cells   Granulocyte percentage of myeloid white cells   Monocyte percentage of white cells   Neutrophil percentage of granulocytes   Sum eosinophil basophil counts                                                                                                                                                                                   |
| rs192665233 | 0.021   | - | -     | -3.240 | -      | 27863252 | Astle W | Granulocyte count   Lymphocyte percentage of white cells   Neutrophil count   Neutrophil percentage of white cells   Sum basophil neutrophil counts   Sum neutrophil eosinophil counts                                                                                                                                                                                                                                                          |
| rs3132713   | 0.022   | - | -     | -3.240 | -      | 27863252 | Astle W | Hemoglobin concentration   High light scatter percentage of red cells   High light scatter reticulocyte count   Immature fraction of reticulocytes   Lymphocyte count   Lymphocyte percentage of white cells   Mean corpuscular hemoglobin   Mean corpuscular hemoglobin concentration   Mean corpuscular volume   Neutrophil percentage of white cells   Red cell distribution width   Reticulocyte count   Reticulocyte fraction of red cells |
| rs9533128   | 0.024   | - | -     | -3.240 | -      | -        | -       | -                                                                                                                                                                                                                                                                                                                                                                                                                                               |
| rs1984021   | 2.2E-03 | - | -     | -      | -1.327 | 27863252 | Astle W | Platelet count   Plateletcrit                                                                                                                                                                                                                                                                                                                                                                                                                   |

|             |         |   |   |   |        |          |            |                                                                                                                                                                                                                                                                                                                                                                                                                                                                                            |
|-------------|---------|---|---|---|--------|----------|------------|--------------------------------------------------------------------------------------------------------------------------------------------------------------------------------------------------------------------------------------------------------------------------------------------------------------------------------------------------------------------------------------------------------------------------------------------------------------------------------------------|
| rs4795397   | 2.7E-03 | - | - | - | -1.327 | 27863252 | Astle W    | Basophil count   Eosinophil percentage of granulocytes   Eosinophil percentage of white cells   Granulocyte count   Granulocyte percentage of myeloid white cells   Lymphocyte count   Lymphocyte percentage of white cells   Monocyte percentage of white cells   Myeloid white cell count   Neutrophil count   Neutrophil percentage of granulocytes   Neutrophil percentage of white cells   Sum basophil neutrophil counts   Sum neutrophil eosinophil counts   White blood cell count |
|             |         |   |   |   |        | 29083406 | Ferreira M | Allergic disease                                                                                                                                                                                                                                                                                                                                                                                                                                                                           |
|             |         |   |   |   |        | 24097068 | GLGC       | High density lipoprotein                                                                                                                                                                                                                                                                                                                                                                                                                                                                   |
|             |         |   |   |   |        | 22961000 | Liu        | Primary biliary cirrhosis                                                                                                                                                                                                                                                                                                                                                                                                                                                                  |
|             |         |   |   |   |        | 26192919 | IBDGC      | Crohns disease   Inflammatory bowel disease   Ulcerative colitis                                                                                                                                                                                                                                                                                                                                                                                                                           |
|             |         |   |   |   |        | 24390342 | Okada Y    | Rheumatoid arthritis                                                                                                                                                                                                                                                                                                                                                                                                                                                                       |
|             |         |   |   |   |        | 29273806 | TAGC       | Asthma                                                                                                                                                                                                                                                                                                                                                                                                                                                                                     |
| rs7654909   | 4.4E-03 | - | - | - | -1.327 | -        | -          | -                                                                                                                                                                                                                                                                                                                                                                                                                                                                                          |
| rs72974176  | 0.005   | - | - | - | -1.327 | 27863252 | Astle W    | Hematocrit   Mean corpuscular hemoglobin   Mean corpuscular hemoglobin concentration   Mean corpuscular volume   Platelet count   Plateletcrit   Red blood cell count   Red cell distribution width                                                                                                                                                                                                                                                                                        |
| rs113107801 | 7.2E-03 | - | - | - | -1.327 | 27863252 | Astle W    | Lymphocyte count                                                                                                                                                                                                                                                                                                                                                                                                                                                                           |
| rs77619009  | 9.5E-03 | - | - | - | -1.327 | 26192919 | IBDGC      | Inflammatory bowel disease   Ulcerative colitis                                                                                                                                                                                                                                                                                                                                                                                                                                            |
|             |         |   |   |   |        | 24390342 | Okada Y    | Rheumatoid arthritis                                                                                                                                                                                                                                                                                                                                                                                                                                                                       |
|             |         |   |   |   |        | 27863252 | Astle W    | White blood cell count                                                                                                                                                                                                                                                                                                                                                                                                                                                                     |
| rs2428514   | 0.017   | - | - | - | -1.327 | 27992413 | Ji S       | Primary sclerosing cholangitis                                                                                                                                                                                                                                                                                                                                                                                                                                                             |
|             |         |   |   |   |        | 24390342 | Okada Y    | Rheumatoid arthritis                                                                                                                                                                                                                                                                                                                                                                                                                                                                       |
| rs114694170 | 0.022   | - | - | - | -1.327 | 27863252 | Astle W    | Mean corpuscular hemoglobin   Mean corpuscular volume   Mean platelet volume   Platelet count   Platelet distribution width   Plateletcrit   Red blood cell count                                                                                                                                                                                                                                                                                                                          |
| rs7098181   | 0.022   | - | - | - | -1.327 | 27863252 | Astle W    | Granulocyte count   Granulocyte percentage of myeloid white cells   Mean platelet volume   Monocyte percentage of white cells   Myeloid white cell count   Neutrophil count   Neutrophil percentage of white cells   Platelet count   Platelet distribution width   Sum basophil neutrophil counts   Sum neutrophil eosinophil counts   White blood cell count                                                                                                                             |
| rs7098181   | 0.022   |   |   |   | -1.327 | 27225129 | SSGAC      | Years of educational attainment in males   Years of educational attainment                                                                                                                                                                                                                                                                                                                                                                                                                 |
| rs10066265  | 0.025   | - | - | - | -1.327 | 27863252 | Astle W    | Mean platelet volume   Platelet count   Red cell distribution width                                                                                                                                                                                                                                                                                                                                                                                                                        |
| rs145125135 | 0.037   | - | - | - | -1.327 | 27863252 | Astle W    | Mean corpuscular hemoglobin   Mean corpuscular volume   Platelet count   Plateletcrit   Red blood cell count   Red cell distribution width                                                                                                                                                                                                                                                                                                                                                 |

|            |       |   |   |   |        |                                  |                              |                                                                                                                                                                                                                                                                                                                                                                                                          |
|------------|-------|---|---|---|--------|----------------------------------|------------------------------|----------------------------------------------------------------------------------------------------------------------------------------------------------------------------------------------------------------------------------------------------------------------------------------------------------------------------------------------------------------------------------------------------------|
| rs2523466  | 0.042 | - | - | - | -1.327 | 27863252                         | Astle W                      | Basophil count   Granulocyte count   Hematocrit   Hemoglobin concentration   High light scatter percentage of red cells   High light scatter reticulocyte count   Lymphocyte count   Monocyte count   Myeloid white cell count   Neutrophil count   Reticulocyte count   Reticulocyte fraction of red cells   Sum basophil neutrophil counts   Sum neutrophil eosinophil counts   White blood cell count |
| rs2523466  | 0.042 | - | - | - | -1.327 | 27723758<br>27992413<br>24390342 | Bronson P<br>Ji S<br>Okada Y | IgA deficiency<br>Primary sclerosing cholangitis<br>Rheumatoid arthritis                                                                                                                                                                                                                                                                                                                                 |
| rs56043070 | 0.066 | - | - | - | -1.327 | 27863252                         | Astle W                      | High light scatter percentage of red cells   High light scatter reticulocyte count   Mean platelet volume   Platelet count   Platelet distribution width   Plateletcrit   Reticulocyte count   Reticulocyte fraction of red cells                                                                                                                                                                        |

**Table S13: Mediation analysis of variant-specific effects.** For each variant, the total effect on ALL risk was decomposed into direct and indirect effects, mediated via regulation of blood cell profiles. Mediator-outcome effects were obtained from Mendelian randomization analyses excluding outliers (as seen in Table S9).

|                                |                     | OR <sub>ALL</sub> | P <sub>ALL</sub>      | β <sub>ALL</sub> | (95% CI) <sup>1</sup> | Mediated (%) |              |
|--------------------------------|---------------------|-------------------|-----------------------|------------------|-----------------------|--------------|--------------|
| Mediator: PLR                  |                     | 0.82              | 5.8×10 <sup>-3</sup>  | -0.200           |                       |              |              |
| rs4245597<br>(ARID5B, 10q21.2) | Total               | 0.60              | 5.3×10 <sup>-46</sup> | -0.505           | (-0.575, -0.436)      |              |              |
|                                | Direct              |                   |                       | -0.500           | (-0.571, -0.431)      |              |              |
|                                | Indirect (mediated) |                   |                       | -0.004           | (-0.007, -0.001)      | 0.84         | (0.23, 1.44) |
| rs76428106<br>(FLT3, 13q12.2)  | Total               | 0.56              | 3.2×10 <sup>-5</sup>  | -0.580           | (-0.853, -0.307)      |              |              |
|                                | Direct              |                   |                       | -0.562           | (-0.841, -0.291)      |              |              |
|                                | Indirect (mediated) |                   |                       | -0.014           | (-0.024, -0.004)      | 2.43         | (0.68, 4.19) |
| Mediator: NLR                  |                     | 0.67              | 1.4×10 <sup>-4</sup>  | -0.400           |                       |              |              |
| rs4245597<br>(ARID5B, 10q21.2) | Total               | 0.60              | 5.3×10 <sup>-46</sup> | -0.505           | (-0.575, -0.436)      |              |              |
|                                | Direct              |                   |                       | -0.496           | (-0.567, -0.426)      |              |              |
|                                | Indirect (mediated) |                   |                       | -0.008           | (-0.013, -0.004)      | 1.65         | (0.79, 2.51) |
| rs6430608<br>(2q22.1)          | Total               | 0.78              | 2.5×10 <sup>-6</sup>  | -0.244           | (-0.346, -0.142)      |              |              |
|                                | Direct              |                   |                       | -0.231           | (-0.334, -0.129)      |              |              |
|                                | Indirect (mediated) |                   |                       | -0.012           | (-0.018, -0.006)      | 4.72         | (2.26, 7.20) |
| Mediator: LMR                  |                     | 1.19              | 0.016                 | 0.173            |                       |              |              |
| rs4948492<br>(ARID5B, 10q21.2) | Total               | 1.66              | 5.1×10 <sup>-46</sup> | 0.507            | (0.437, 0.577)        |              |              |
|                                | Direct              |                   |                       | 0.503            | (0.433, 0.574)        |              |              |
|                                | Indirect (mediated) |                   |                       | 0.004            | (-0.001, 0.008)       | 0.75         | (0, 1.63)    |
| rs74756667<br>(8q24.2)         | Total               | 1.37              | 3.3×10 <sup>-10</sup> | 0.313            | (0.215, 0.410)        |              |              |
|                                | Direct              |                   |                       | 0.310            | (0.210, 0.407)        |              |              |
|                                | Indirect (mediated) |                   |                       | 0.004            | (0.001, 0.007)        | 1.31         | (0.24, 2.38) |
| rs2239630<br>(CEBPE, 14q11.2)  | Total               | 1.32              | 1.2×10 <sup>-13</sup> | 0.278            | (0.206, 0.353)        |              |              |
|                                | Direct              |                   |                       | 0.275            | (0.199, 0.348)        |              |              |
|                                | Indirect (mediated) |                   |                       | 0.006            | (-0.001, 0.013)       | 2.16         | (0, 4.71)    |
| rs78697948*<br>(IKZF1, 7p12.2) | Total               | 0.68              | 1.2×10 <sup>-10</sup> | -0.391           | (-0.509, -0.272)      |              |              |
|                                | Direct              |                   |                       | -0.395           | (-0.516, -0.276)      |              |              |
|                                | Indirect (mediated) |                   |                       | 0.007            | (-0.001, 0.015)       | 1.72         | (0, 3.75)    |
| rs76428106*<br>(FLT3, 13q12.2) | Total               | 0.56              | 3.2×10 <sup>-5</sup>  | -0.580           | (-0.853, -0.307)      |              |              |
|                                | Direct              |                   |                       | -0.637           | (-0.918, -0.368)      |              |              |
|                                | Indirect (mediated) |                   |                       | 0.066            | (0.012, 0.120)        | 11.39        | (2.07, 20.7) |
| Mediator: Lymphocytes          |                     | 1.18              | 7.4×10 <sup>-3</sup>  | 0.166            | (0.045, 0.288)        |              |              |
| rs76428106<br>(FLT3, 13q12.2)  | Total               | 1.79              | 3.2×10 <sup>-5</sup>  | 0.580            | (0.307, 0.853)        |              |              |
|                                | Direct              |                   |                       | 0.569            | (0.290, 0.840)        |              |              |
|                                | Indirect (mediated) |                   |                       | 0.015            | (0.004, 0.025)        | 2.51         | (0.67, 4.35) |

<sup>1</sup> Bootstrapped 95% confidence intervals for direct and indirect (mediated) effects were obtained using 1000 replicates.

\* Variants had statistically significant effects, and of larger magnitude, on monocyte counts than LMR or lymphocytes
